# Supplementary material for: Human DNA ligase IV is able to use NAD+ as an alternative adenylation donor for DNA ends ligation
Source: PubMed Central journal article supplement (PMC6379666; doi:10.1093/nar/gky1202), 2018-11-28
Supplement: gky1202_supplemental_files.pdf [file gky1202_supplemental_files.pdf]

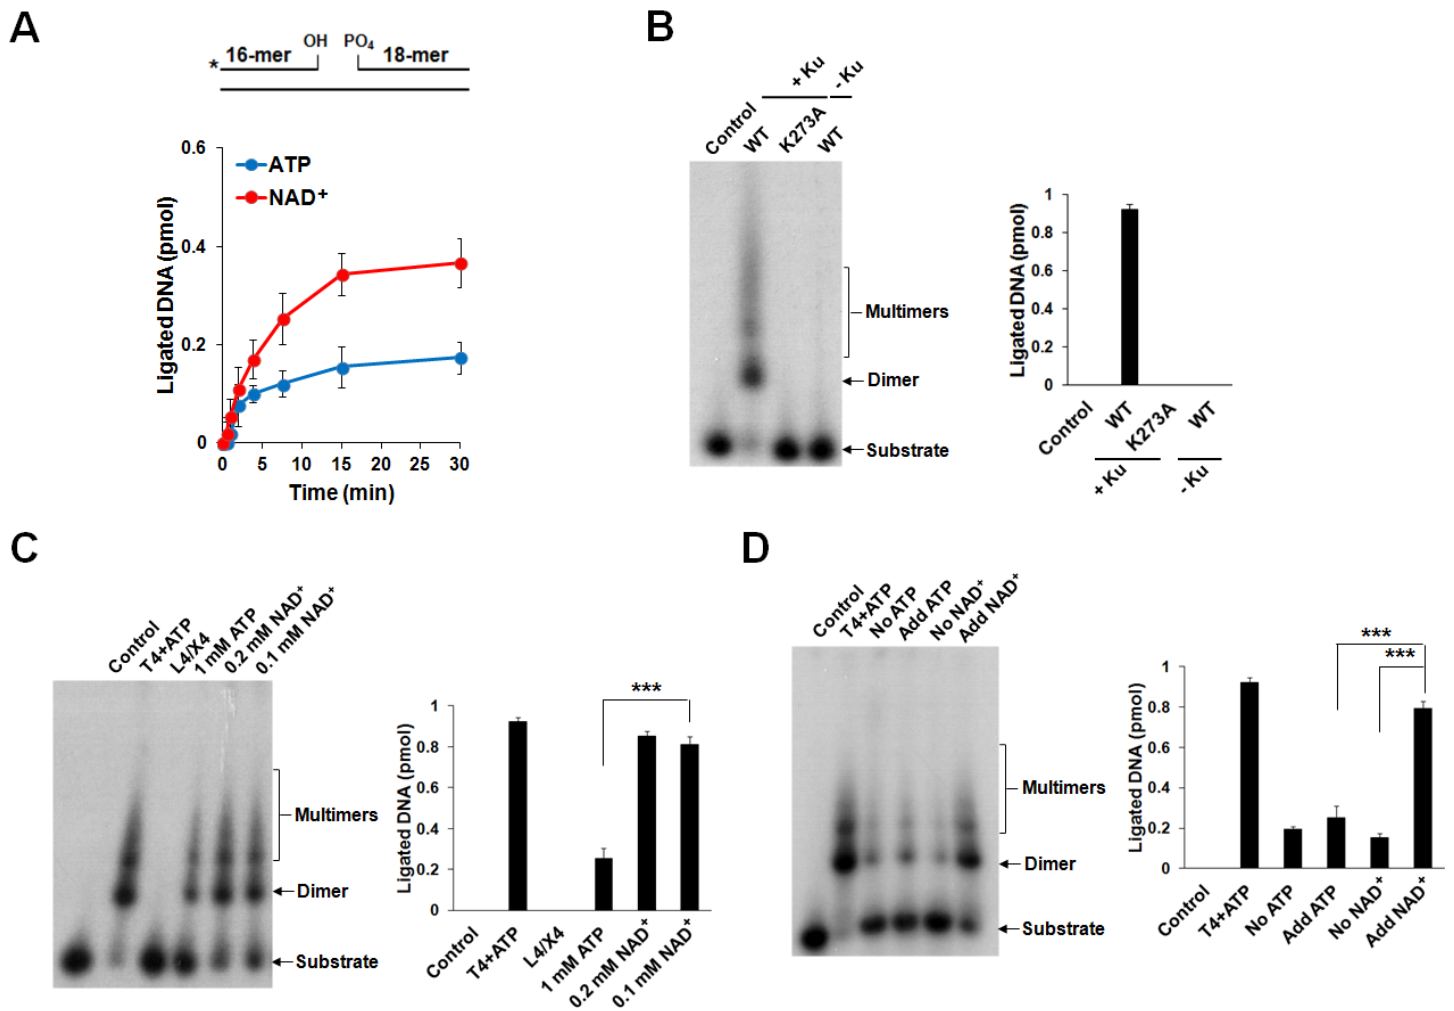

**Supplementary Figure S1. DNA Ligase IV/XRCC4 uses multiple donors as co-factor for DNA ligation.** (A) Time-course Nick ligation assay using 1 mM NAD<sup>+</sup> or ATP. (B) 4nt-overhang ligation assay using 1 mM NAD<sup>+</sup> with and without 25 nM Ku70/80. (C) 4nt-overhang ligation assay using 1 mM ATP and a dose course of NAD<sup>+</sup> as co-factor. L4/X4 means Ligase IV/XRCC4 complex without any co-factor. (D) The effect of added ATP or NAD<sup>+</sup> (to promote readenylation) on 4-nt overhang ligation. Reactions (20 nM Ligase IV/XRCC4 and 100 nM DNA end substrate) started with a 0.5-h incubation at 37 °C followed by addition of 1 mM ATP or 0.1 mM NAD<sup>+</sup>, and incubation continued for 15 min at room temperature followed finally by a second incubation for 1 h. (B-D) Control means no protein and T4 DNA ligase (T4, 4000 units/mL) with ATP was used as a positive control. (A-D) Ligated products were analyzed and presented as the mean  $\pm$  SD from 3 independent experiments.

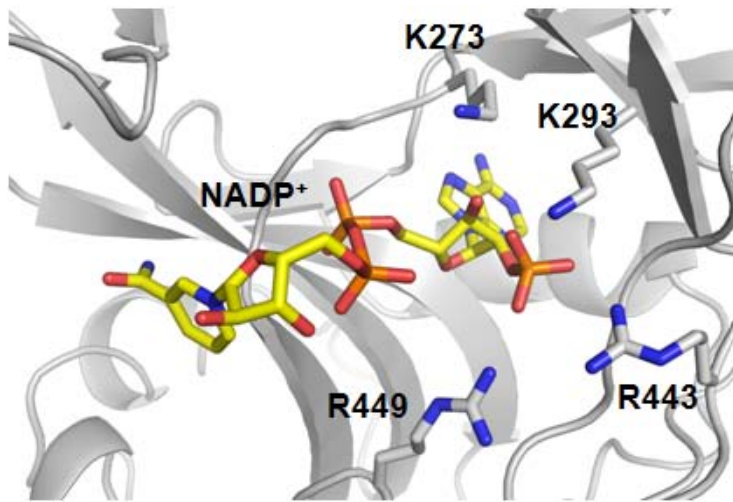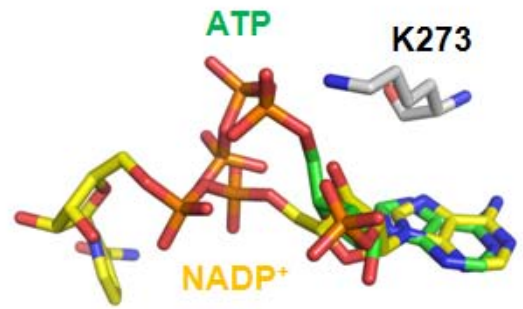

**Supplementary Figure S2. NADP<sup>+</sup> is unable to be used by Ligase IV to form Ligase-adenylate.** The binding mode of NADP<sup>+</sup> (yellow) in the adenylation domain of human DNA Ligase IV is different from that of ATP (green, PDB: 3W5O). AMP moieties of NADP<sup>+</sup> and ATP are not superimposed. Long distance (> 5Å) between diphosphate and Lys273 was observed, which is different from that of ATP or NAD<sup>+</sup> (~ 3Å from Lys273).

**A**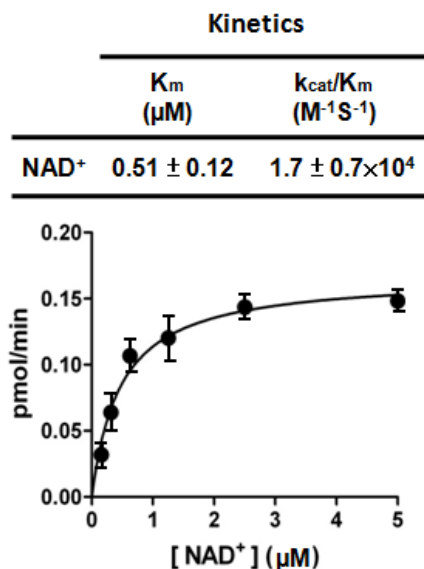**B**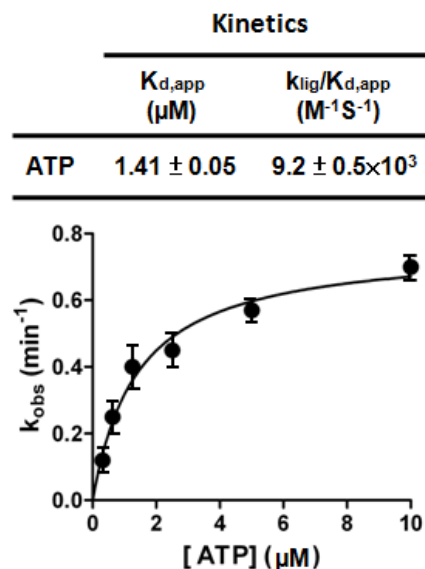

**Supplementary Figure S3. Kinetic parameters of NAD<sup>+</sup>- and ATP-mediated ligation.** (A) For NAD<sup>+</sup>-mediated ligation, 25 nM Ligase IV/XRCC4 complex was incubated with 500 nM DNA end substrates for multiple turnover analysis. The concentrations of NAD<sup>+</sup> were used from 0.156  $\mu\text{M}$  to 5  $\mu\text{M}$ . Kinetic parameters of NAD<sup>+</sup>-mediated ligation were obtained and measured based on Michaelis-Menten equation. (B) For ATP-mediated ligation, 500 nM Ligase IV/XRCC4 complex was incubated with 100 nM DNA end substrates for single turnover analysis. The concentrations of ATP were used from 0.3125  $\mu\text{M}$  to 10  $\mu\text{M}$ . Saturation curve was obtained by plotting the apparent rate constant ( $k_{obs}$ ) of single turnover reactions as a function of ATP concentration and fitting the data to  $k_{obs} = k_{lig}[S]/(K_{d,app} + [S])$ , where  $k_{lig}$  is the catalytic rate constant, and  $K_{d,app}$  is the apparent equilibrium dissociation constant. (A and B) Results were analyzed from three independent experiments.

**A**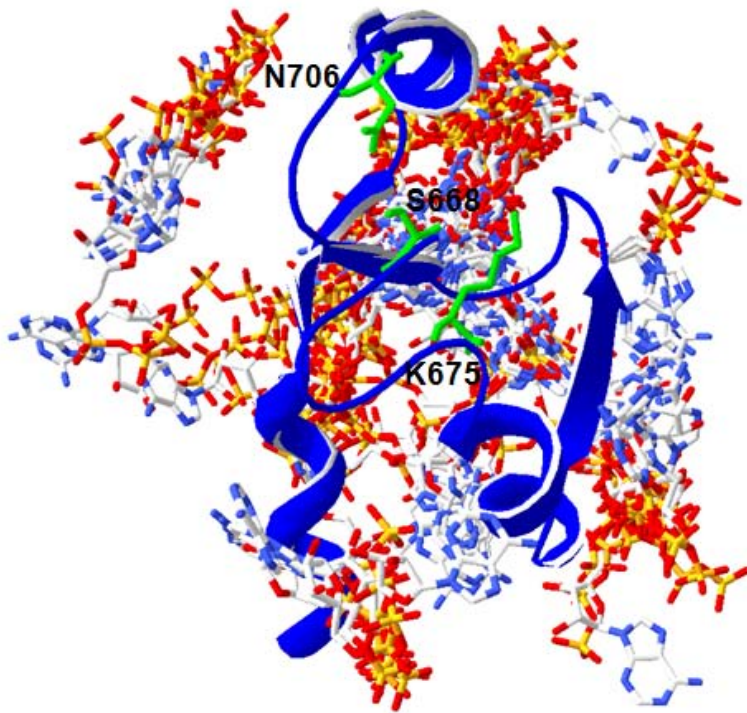**B**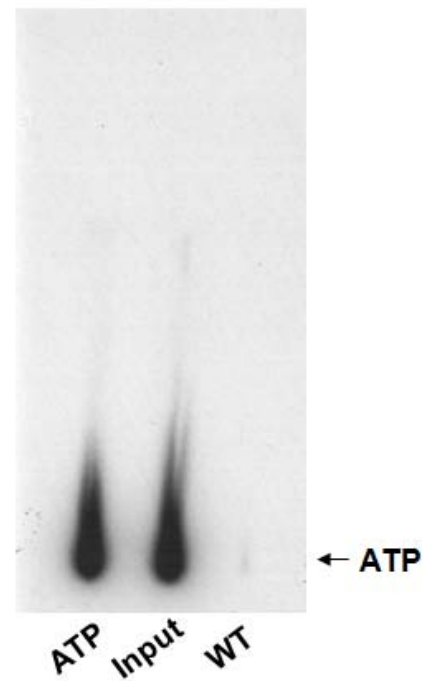

**Supplementary Figure S4. The BRCT domain of Ligase IV does not bind to ATP.** (A) Docking analysis using ATP and BRCT domain of Ligase IV (PDB: 2E2W). 100 binding modes of ATP were generated by GEMDOCK. Compared with  $\text{NAD}^+$ , ATP cannot fit into the pocket surrounded by S668 and K675. Thus, ATP is scattered around the BRCT domain. (B) 1  $\mu\text{M}$  wild type (WT) BRCT domain were incubated with 500 nM ATP (10 nM  $^{32}\text{P}$ -ATP and 490 nM unlabeled ATP) in the pull-down assays with 100  $\mu\text{l}$  volume. The samples were analyzed by thin-layer chromatography (TLC). (n=3 independent experiments).

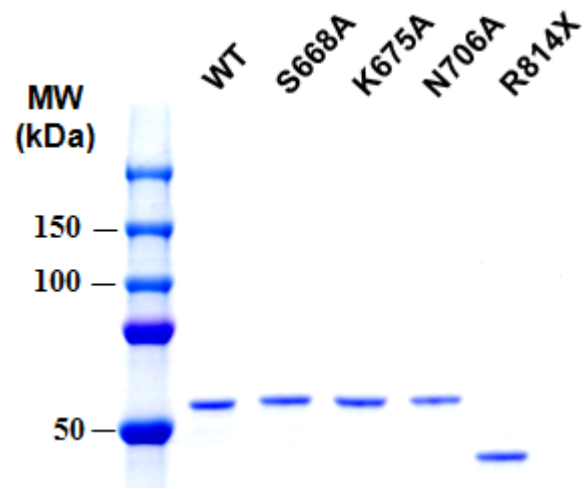

**Supplementary Figure S5. Recombinant BRCT domains of DNA ligase IV.** GST-wild type (WT) BRCTs and four variants (S668A, K675A, N706A, and R814X) were expressed in *E. coli*. The proteins were purified with GST beads and analyzed by 7.5 % SDS-PAGE.

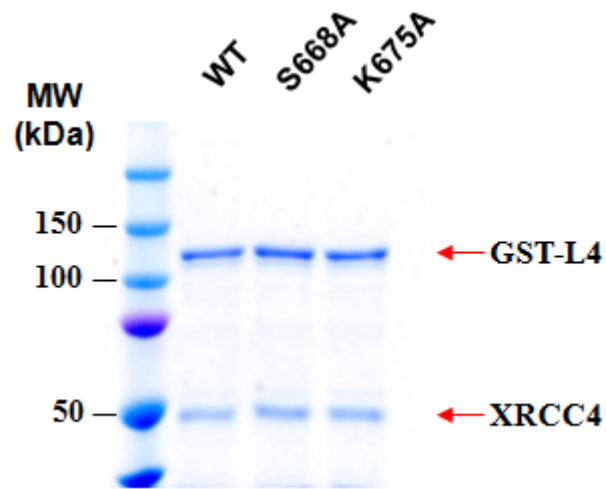

**Supplementary Figure S6. Neither S668A nor K675A abolishes the interaction with XRCC4.** GST- wild type (WT) Ligase IV, the S668A mutant, or the K675A mutant were co-expressed with XRCC4 (no tag) in Sf9 cells. The complex were formed and purified with GST beads. The samples were analyzed by 7.5 % SDS-PAGE.

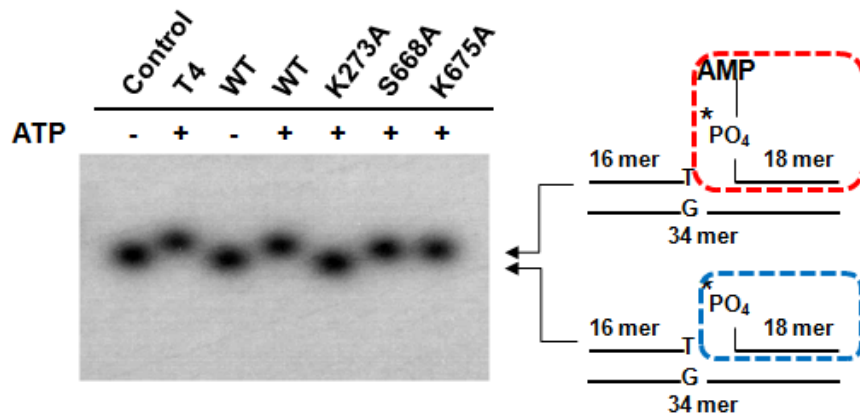

**Supplementary Figure S7. Mutations of BRCT domain do not abolish formation of ATP-mediated Adenylated DNA (App-DNA).** The wild type Ligase IV or its mutants (25 nM) were incubated with 1 mM ATP for adenylation, then incubated with 5 nM  $^{32}\text{P}$ -labeled 3' mismatch DNA substrates in 10  $\mu\text{l}$ . A star indicates the position of the radioisotope label. App-DNA complexes were analyzed by 20 % TBE-native gel and autoradiography. Control means no protein. T4 DNA ligase (T4, 4000 units/mL) and the K273A mutant complex (K273A) were used as positive and negative control, respectively.

**A**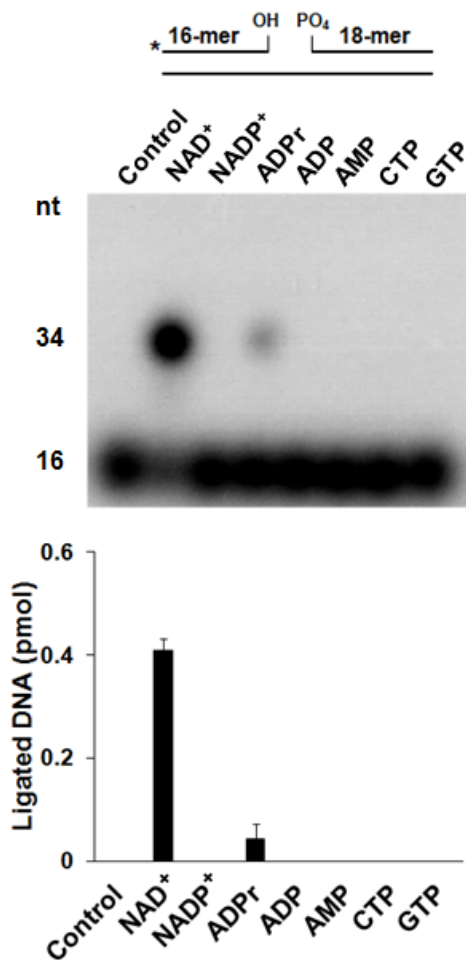**B**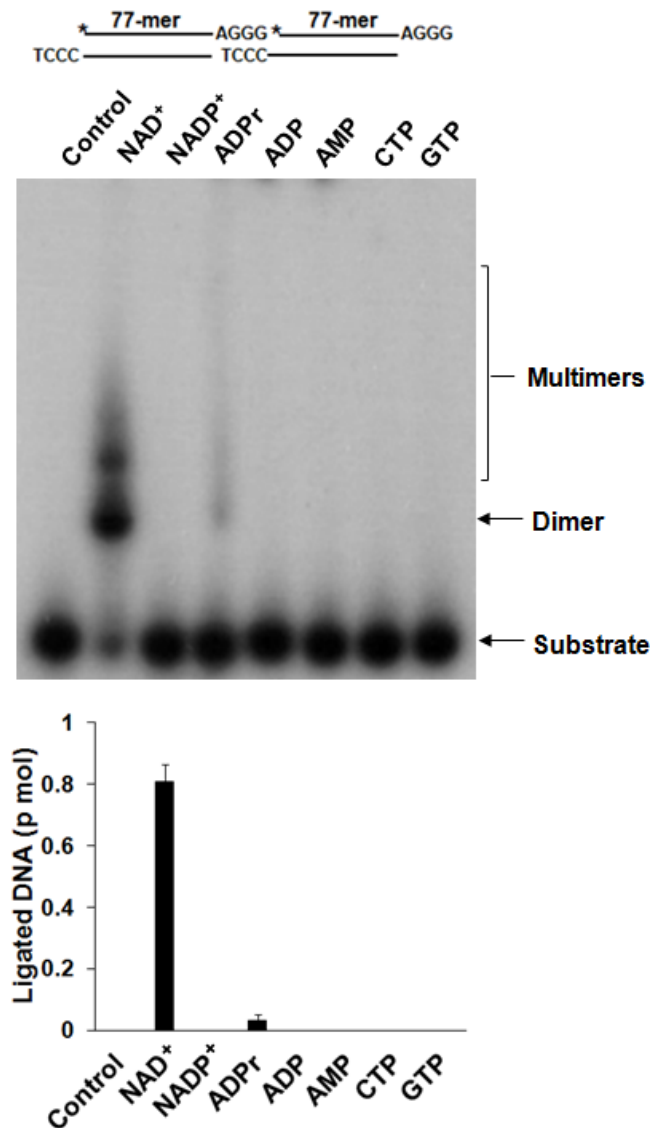

**Supplementary Figure S8. Other nucleic acid-mediated ligation.** 1 mM NAD<sup>+</sup>, NADP<sup>+</sup>, ADP-ribose (ADPr), ADP, AMP, CTP, and GTP were incubated with Ligase IV/XRCC4 (25 nM) for the nicked (A) or 4 nt-overhang (B) DNA ligation. The nicked DNA end substrate was 50 nM and 4 nt-overhang DNA end substrate was 100 nM. A star indicates the position of the radioisotope label. Control means no protein. NAD<sup>+</sup> and AMP were used as a positive control and a negative control, respectively. Ligated products were analyzed and presented as mean ± SD from 3 independent experiments.



**A**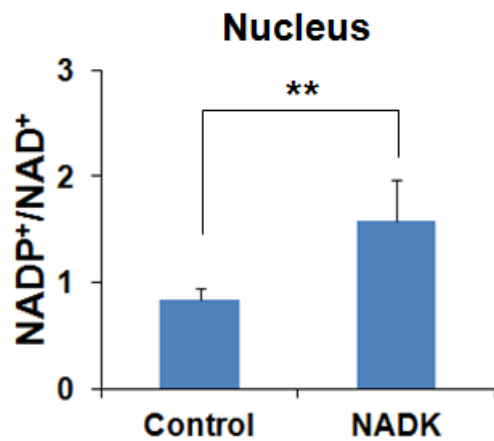

|                        | Control | NADK  |
|------------------------|---------|-------|
| NADP <sup>+</sup> (μM) | 115.1   | 147.3 |
| NAD <sup>+</sup> (μM)  | 138.3   | 93.5  |

**B**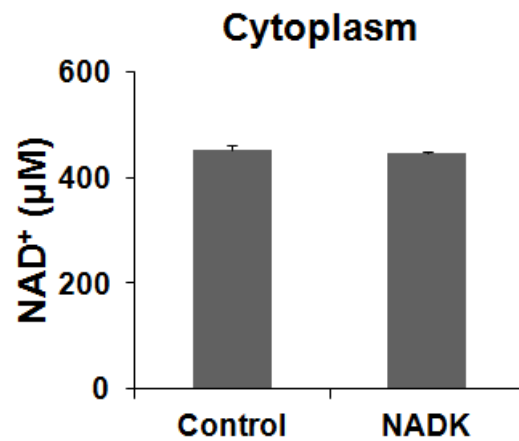

**Supplementary Figure S9. NADK changes the ratio of nuclear NADP<sup>+</sup>/NAD<sup>+</sup>, but the cytoplasmic NAD<sup>+</sup> level is unaffected.** (A) The NADP<sup>+</sup>/NAD<sup>+</sup> ratio were measured by EnzyChrom assay kits with nucleus extracts from U2OS (control) and U2OS-NADK cells. Bar graph shows the mean NADP<sup>+</sup>/NAD<sup>+</sup> ratio (n=3 independent experiments, \*\* denotes  $p < 0.01$ ). (B) The concentrations of NAD<sup>+</sup> in cytoplasm were examined by EnzyChrom NAD<sup>+</sup>/NADH assay kits. Bar graph shows the mean concentration of NAD<sup>+</sup> (n=3 independent experiments).

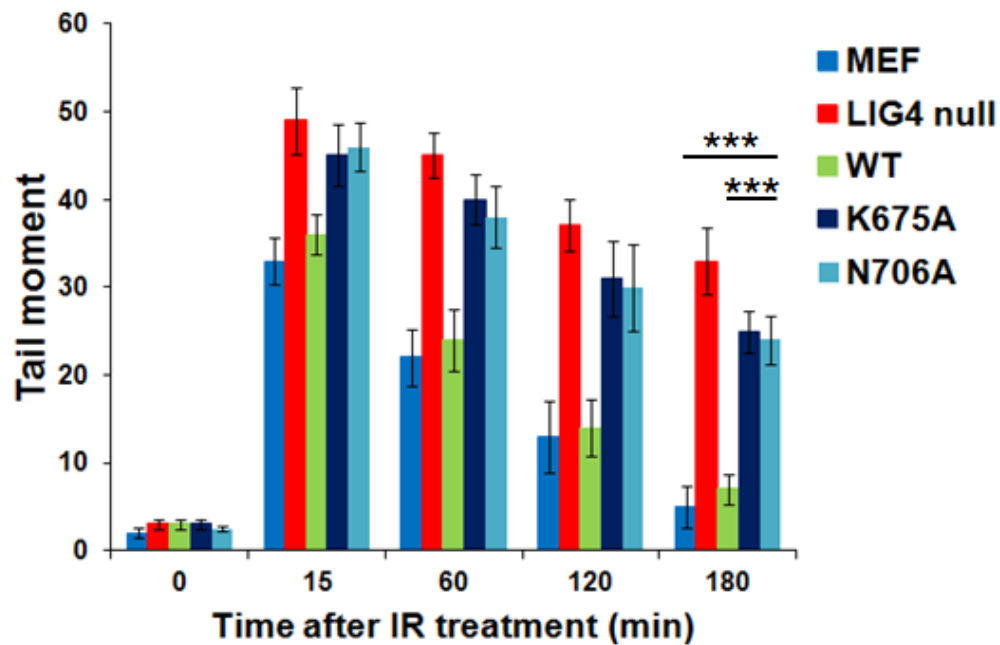

**Supplementary Figure S10. Mutations of BRCT domain impair NAD<sup>+</sup>-mediated DSB repair in cells.** IR-induced DSBs is examined by neutral comet assay. Wild type MEFs, Ligase IV<sup>-/-</sup> MEFs (LIG4 null), and Ligase IV<sup>-/-</sup> MEFs reconstituted with wild type Ligase IV (WT) or two mutants (K675A and N706A) were treated with IR (5 Gy) followed by 4-hour recovery and neutral comet assay. Average tail moments of cells (mean ± SD) were shown in the histogram from 3 independent experiments. \*\*\* denotes  $p < 0.001$ .

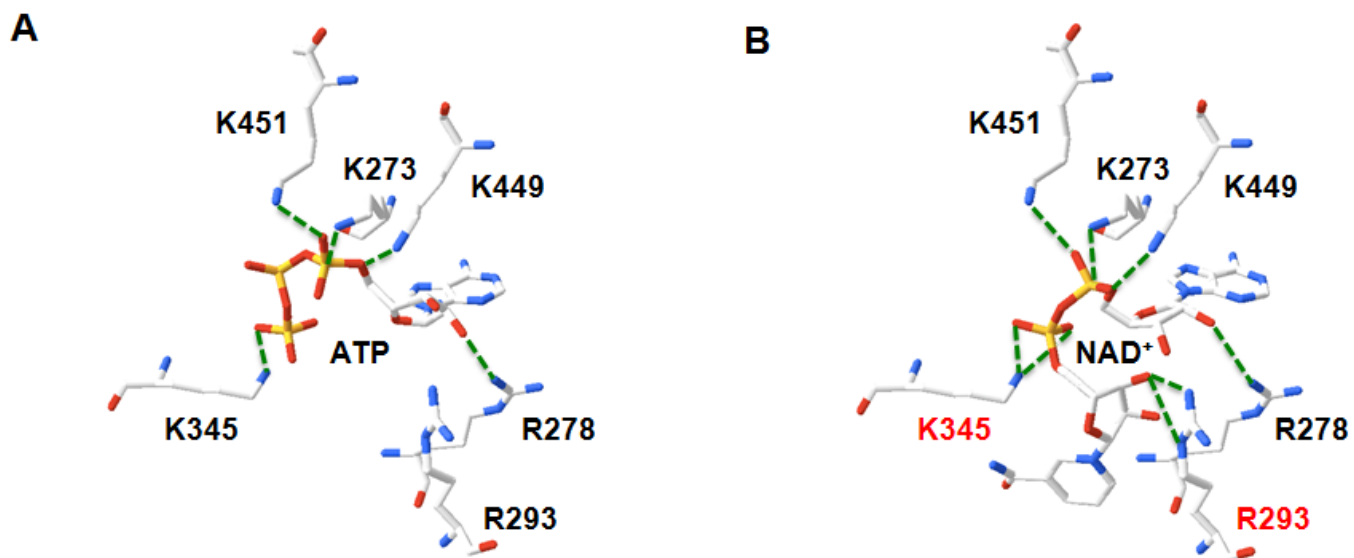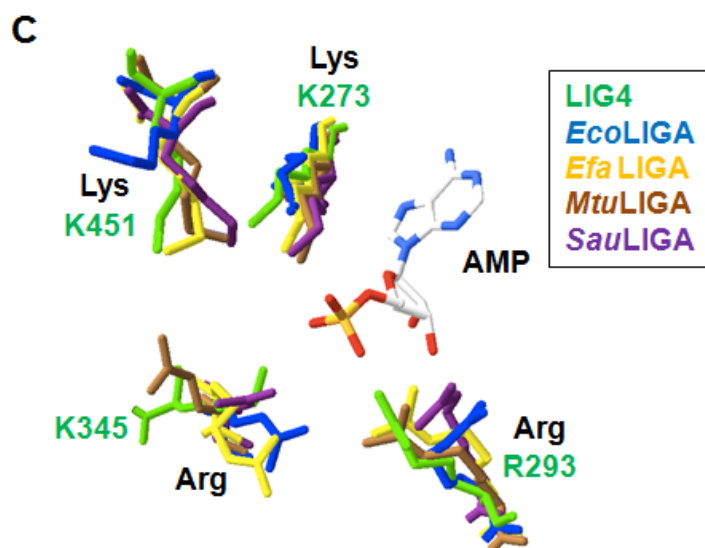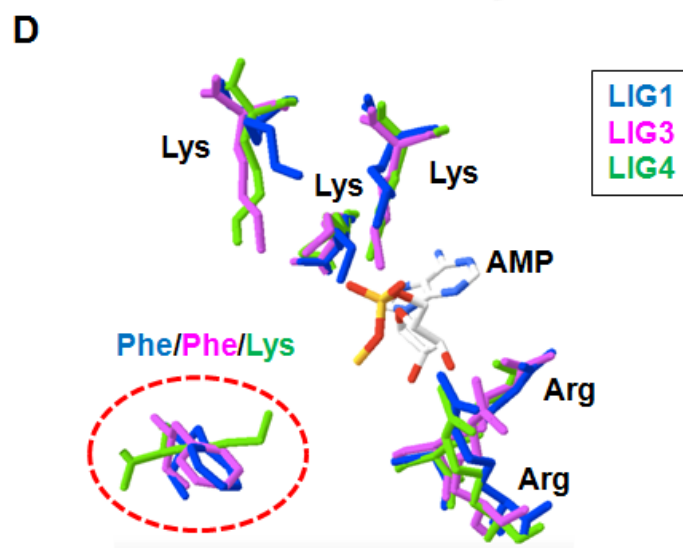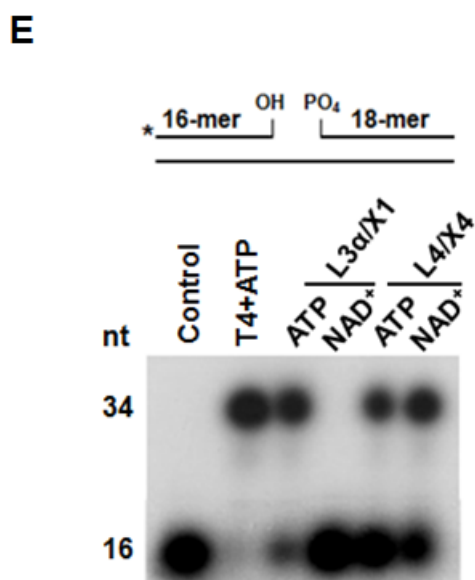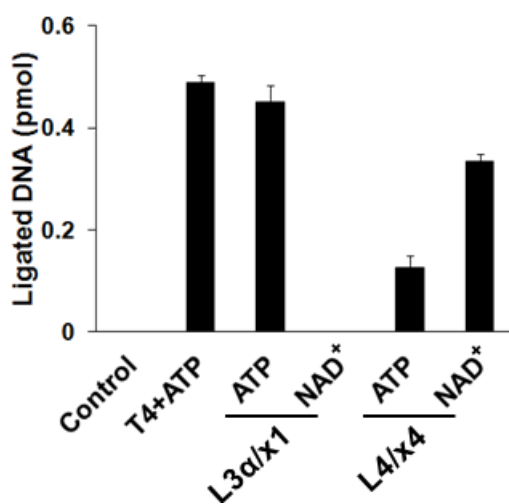

**Supplementary Figure S11. Comparisons of active sites of Ligase IV and other NAD<sup>+</sup>-mediated DNA ligases.** The binding modes of ATP (A) and docked NAD<sup>+</sup> (B) in the Ligase IV active site (PDB: 3W5O). Hydrogen bonds are shown in green dotted lines. The key residues of Ligase IV for NAD<sup>+</sup>-mediated adenylation are highlighted in red. (C) Superimposition of Ligase IV (PDB: 3W5O) and four NAD<sup>+</sup>-dependent ligases (PDBs: 2OWO, 1TAE, 1ZAU, and 3JSN) from *Escherichia coli* (*Eco*), *Enterococcus faecalis* (*Efa*), *Mycobacterium tuberculosis* (*Mtu*), and *Staphylococcus aureus* (*Sau*). (D) Overlap of three human DNA ligases (LIG1: 1X9N; LIG3: 3L2P; LIG4: 3W5O) for active sites analysis. The key different residues are marked by red dotted circle. (E) Nicked ligation assays were carried out with 25 nM Ligase III- $\alpha$ /XRCC1 (L3 $\alpha$ /X1) complex and Ligase IV/XRCC4 (L4/X4) complex together with 1 mM ATP or NAD<sup>+</sup>. Control means no protein and T4 DNA ligase (T4, 4000 units/mL) with ATP was used as a positive control. Ligated products were analyzed and presented as mean  $\pm$  SD from 3 independent experiments.

|             |                                                                                                                         |     |
|-------------|-------------------------------------------------------------------------------------------------------------------------|-----|
| HumLIGA 658 | - - - I F E D V E F C V M S G T D S Q - P K P D L E N R I A E F G G Y I V Q N P G P D T Y C V I A G S E N I R V K N I I | 743 |
| TfiLIGA 586 | E V S D L L S G L T F V L T G E L S R - P R E E V K A L L Q R L G A K V T D S V S R K T S Y L V V G E N P G S K L E K A | 670 |
| TthLIGA 589 | K G G E A L K G L T F V I T G E L S R - P R E E V K A L L R R L G A K V T D S V S R K T S Y L V V G E N P G S K L E K A | 676 |
| EcoLIGA 593 | E I D S P F A G K T V V L T G S L S Q M S R D D A K A R L V E L G A K V A G S V S K K T D L V I A G E A A G S K L A K A | 671 |
| HinLIGA 592 | A S E N L F K D K T V V L T G T L T Q M G R N E A K A L L Q Q L G A K V S G S V S S K T D F V I A G D A A G S K L A K A | 670 |
| MtuLIGA 607 | S V P R T L A G L T I V V T G S L T G F S R D D A K E A I V A R G G K A A G S V S K K T N Y V V A G D S P G S K Y D K A | 691 |
| GstLIGA 589 | P A D S A F A G K T V V L T G K L A S M S R N E A K E Q I E R L G G R V T G S V S R S T D L V I A G E D A G S K L E K A | 670 |
| SauLIGA 586 | E G H P E F S G K T I V L T G K L H Q M T R N E A S K W L A S Q G A K V T S S V T K N T D V V I A G E D A G S K L T K A | 667 |
| EfaLIGA 595 | E V E S P F K D K T V V L T G K L A Q Y T R E E A K E K I E N L G G K V T G S V S K K T D I V V A G E D A G S K L T K A | 676 |
| SpnLIGA 577 | V A D A A L S G L T V V L T G K L E R L K R S E A K S K L E S L G A K V T G S V S K K T D L V V V G A D A G S K L Q K A | 652 |

**Supplementary Figure S12. Alignment of amino acid sequence similarity of human DNA ligase IV BRCT1 and other NAD<sup>+</sup>-dependent DNA ligase BRCT domains.** Similar residues (marked in red) that form the potential phosphate group binding pocket are observed in the BRCT domain of human DNA ligase IV and nine other NAD<sup>+</sup>-dependent DNA ligases including *Thermus filiformis* (*Tfi*), *Thermus thermophilus* (*Tth*), *Escherichia coli* (*Eco*), *Haemophilus influenza* (*Hin*), *Mycobacterium tuberculosis* (*Mtu*), *Geobacillus stearothermophilus* (*Gst*), *Staphylococcus aureus* (*Sau*), *Enterococcus faecalis* (*Efa*), and *Streptococcus pneumoniae* (*Spn*). Identical amino acids and similar residues are highlighted on a shaded background. Dashes indicate gaps in the alignments. Stars denote the amino acid residues mutated for DNA ligase IV in this study.
